# Supplementary material for: Miniature diamond-anvil cells for FTIR-microspectroscopy of small quantities of biosamples
Source: Royal Society of Chemistry journal article supplement (doi:10.1039/c8an00432c), 2018-01-01
Supplement: c8an00432c1.pdf [file c8an00432c1.pdf]

Supplementary information

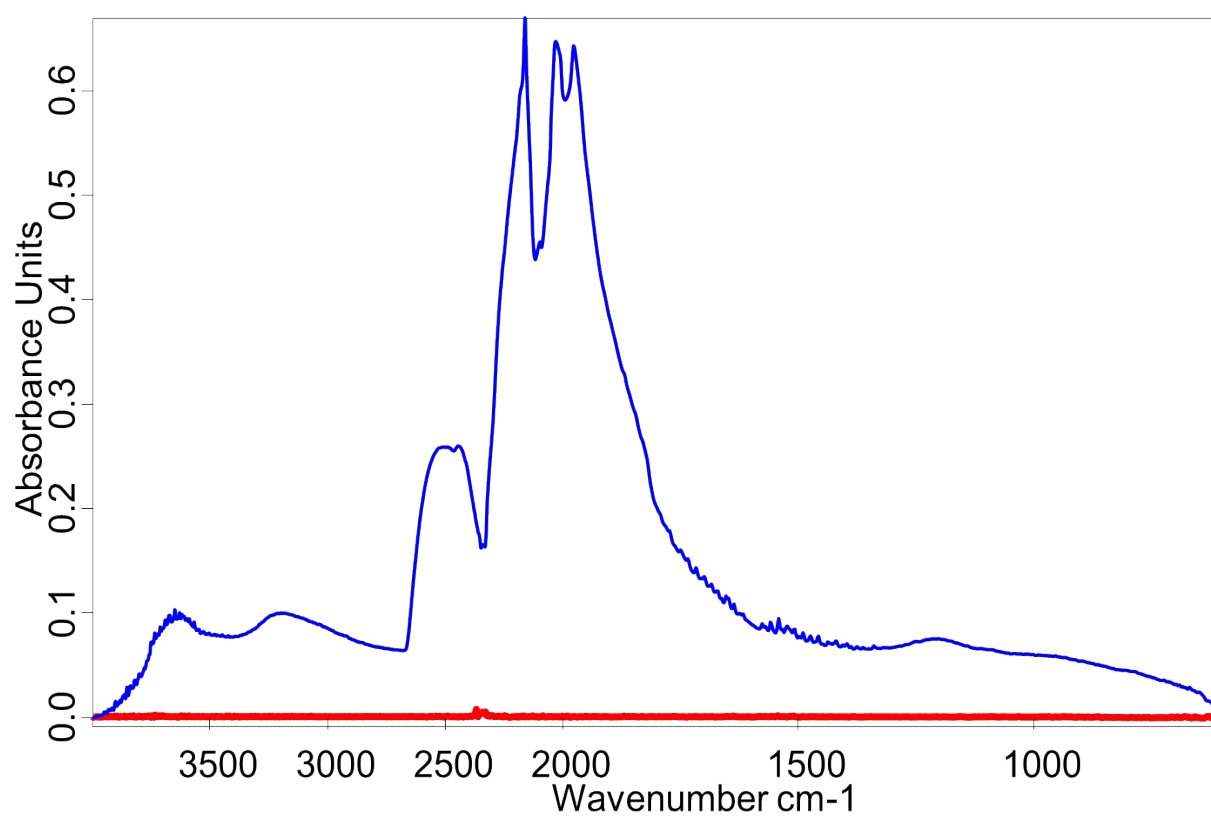

Supplementary Figure 1: FTIR spectrum of raw diamond on DAC (blue) and spectrum after counting diamond as background (red).
